# Supplementary material
Source: Springer Nature journal article supplement (https://www.springermedizin.de/resource/supplementary/12974_2011_457_MOESM3_ESM.pdf/9601354)

**A**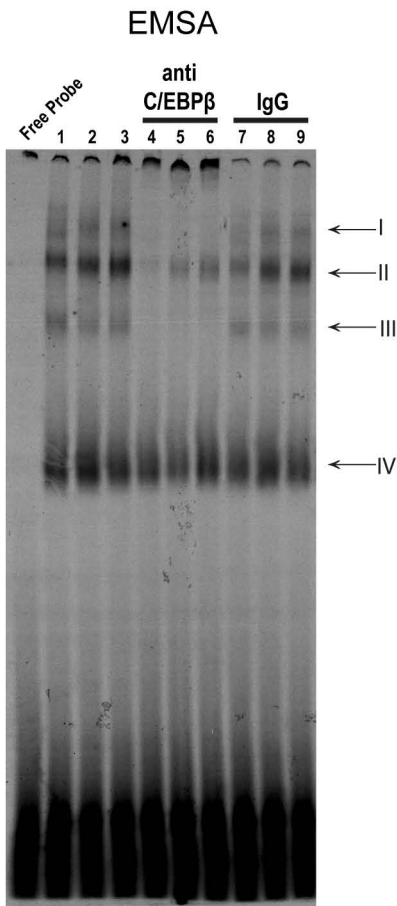**B**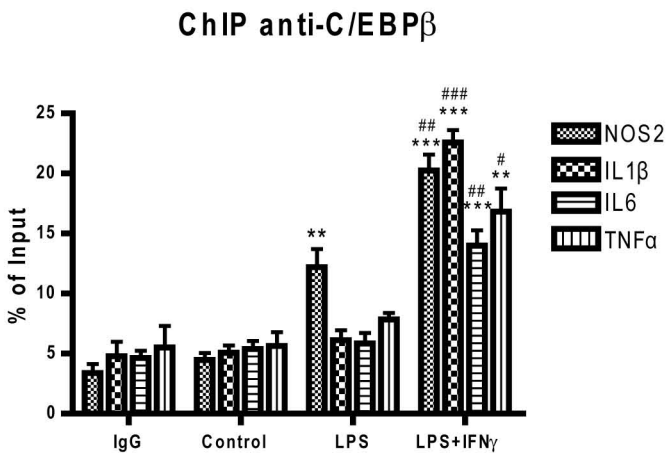

Supplement: MOESM3 [file 9601354]
